# Supplementary material for: Building trauma capability: using geospatial analysis to consider military treatment facilities for trauma center development
Source: HighWire-hosted journal article supplement (doi:10.1136/tsaco-2021-000832), 2022-05-01
Supplement: tsaco-2021-000832supp001_data_supplement.pdf [file tsaco-2021-000832supp001_data_supplement.pdf]

## Supplemental Digital Content

### Supplemental Reference: State/Local EMS Resources

| State | URL                                                                                                                                                                                                                                                                                                                                                   | Accessed | Last Update    |
|-------|-------------------------------------------------------------------------------------------------------------------------------------------------------------------------------------------------------------------------------------------------------------------------------------------------------------------------------------------------------|----------|----------------|
| AK    | <a href="http://dhss.alaska.gov/dph/Emergency/Documents/trauma/Alaska%20Trauma%20Center%20Designation%20Status%202010-2018.xls">http://dhss.alaska.gov/dph/Emergency/Documents/trauma/Alaska%20Trauma%20Center%20Designation%20Status%202010-2018.xls</a>                                                                                             | 4/15/20  | October 2018   |
| AL    | <a href="http://www.alabamapublichealth.gov/aths/trauma-center-levels.html">http://www.alabamapublichealth.gov/aths/trauma-center-levels.html</a>                                                                                                                                                                                                     | 4/15/20  | 2/7/20         |
| AR    | <a href="https://www.healthy.arkansas.gov/images/uploads/pdf/Designated_Trauma_Centers_2-2020.pdf">https://www.healthy.arkansas.gov/images/uploads/pdf/Designated_Trauma_Centers_2-2020.pdf</a>                                                                                                                                                       | 4/15/20  | January 2020   |
| AZ    | <a href="https://www.azdhs.gov/documents/preparedness/emergency-medical-services-trauma-system/trauma/az-designated-trauma-centers.pdf">https://www.azdhs.gov/documents/preparedness/emergency-medical-services-trauma-system/trauma/az-designated-trauma-centers.pdf</a>                                                                             | 4/15/20  | 4/9/20         |
| CA    | <a href="https://ems.ca.gov/wp-content/uploads/sites/71/2019/06/California-Designated-ACS-Verified-Trauma-Centers_2019_6_7.xlsx">https://ems.ca.gov/wp-content/uploads/sites/71/2019/06/California-Designated-ACS-Verified-Trauma-Centers_2019_6_7.xlsx</a>                                                                                           | 4/15/20  | 6/7/19         |
| CO    | <a href="https://docs.google.com/spreadsheets/d/e/2PACX-1vSc_Ud8j1xNTKOZOGEEjB4Z9b7BVgWPJs5PkcW1kGD2rjooCGG3iA-t6ShU97hfTaqpwGZa-CXcYq/pubhtml?gid=381736194&amp;single=true">https://docs.google.com/spreadsheets/d/e/2PACX-1vSc_Ud8j1xNTKOZOGEEjB4Z9b7BVgWPJs5PkcW1kGD2rjooCGG3iA-t6ShU97hfTaqpwGZa-CXcYq/pubhtml?gid=381736194&amp;single=true</a> | 4/15/20  | Unknown        |
| CT    | <a href="https://portal.ct.gov/DPH/Emergency-Medical-Services/EMS/OEMS--CEMSTARS-Data">https://portal.ct.gov/DPH/Emergency-Medical-Services/EMS/OEMS--CEMSTARS-Data</a>                                                                                                                                                                               | 4/15/20  | Unknown        |
| DC    | <a href="https://dchealth.dc.gov/sites/default/files/dc/sites/doh/service_content/attachments/Trauma%20Centers.pdf">https://dchealth.dc.gov/sites/default/files/dc/sites/doh/service_content/attachments/Trauma%20Centers.pdf</a>                                                                                                                     | 4/15/20  | Unknown        |
| DE    | <a href="https://dhss.delaware.gov/dph/ems/trauma.html">https://dhss.delaware.gov/dph/ems/trauma.html</a>                                                                                                                                                                                                                                             | 4/15/20  | Unknown        |
| FL    | <a href="http://www.floridahealth.gov/licensing-and-regulation/trauma-system/documents/traumacenterlisting2018.pdf">http://www.floridahealth.gov/licensing-and-regulation/trauma-system/documents/traumacenterlisting2018.pdf</a>                                                                                                                     | 4/15/20  | 8/8/18         |
| GA    | <a href="https://dph.georgia.gov/EMS/specialty-care-centers-cardiac-trauma-stroke/designated-trauma-specialty-care-centers">https://dph.georgia.gov/EMS/specialty-care-centers-cardiac-trauma-stroke/designated-trauma-specialty-care-centers</a>                                                                                                     | 4/15/20  | 2/6/20         |
| HI    | <a href="https://health.hawaii.gov/emsipsb/hawaii-trauma-system/">https://health.hawaii.gov/emsipsb/hawaii-trauma-system/</a>                                                                                                                                                                                                                         | 4/16/20  | February 2020  |
| IA    | <a href="https://idph.iowa.gov/bets/trauma/facilities-map">https://idph.iowa.gov/bets/trauma/facilities-map</a>                                                                                                                                                                                                                                       | 4/16/20  | Unknown        |
| ID    | <a href="https://healthandwelfare.idaho.gov/Portals/0/Medical/EMS/Front%20Page/2018AnnualBureauReportRev4.pdf">https://healthandwelfare.idaho.gov/Portals/0/Medical/EMS/Front%20Page/2018AnnualBureauReportRev4.pdf</a>                                                                                                                               | 4/16/20  | December 2019  |
| IL    | <a href="http://www.dph.illinois.gov/topics-services/emergency-preparedness-response/ems/trauma-program/centersByReg">http://www.dph.illinois.gov/topics-services/emergency-preparedness-response/ems/trauma-program/centersByReg</a>                                                                                                                 | 4/16/20  | 11/4/19        |
| IN    | <a href="https://www.in.gov/isdh/24972.htm">https://www.in.gov/isdh/24972.htm</a>                                                                                                                                                                                                                                                                     | 4/16/20  | 3/5/20         |
| KS    | <a href="http://www.kstrauma.org/locations.htm">http://www.kstrauma.org/locations.htm</a>                                                                                                                                                                                                                                                             | 4/16/20  | Unknown        |
| KY    | <a href="http://www.mc.uky.edu/kiprc/programs/trauma-registry/annual-reports/2018.pdf">http://www.mc.uky.edu/kiprc/programs/trauma-registry/annual-reports/2018.pdf</a>                                                                                                                                                                               | 4/16/20  | September 2019 |
| LA    | <a href="http://lern.la.gov/trauma/state-designated-trauma-centers/">http://lern.la.gov/trauma/state-designated-trauma-centers/</a>                                                                                                                                                                                                                   | 4/16/20  | 12/20/19       |
| MA    | <a href="https://www.mass.gov/service-details/trauma-hospital-destinations">https://www.mass.gov/service-details/trauma-hospital-destinations</a>                                                                                                                                                                                                     | 4/16/20  | Unknown        |
| MD    | <a href="https://www.maryland-traumanet.com/about/trauma-centers/">https://www.maryland-traumanet.com/about/trauma-centers/</a>                                                                                                                                                                                                                       | 4/16/20  | Unknown        |
| ME    | <a href="https://www11.maine.gov/ems/boards-committees/trauma-advisory">https://www11.maine.gov/ems/boards-committees/trauma-advisory</a>                                                                                                                                                                                                             | 4/16/20  | Unknown        |
| MI    | <a href="https://www.michigan.gov/documents/mdhhs/List_of_Designated_Trauma_Facilities.5.9.17_571865_7.pdf">https://www.michigan.gov/documents/mdhhs/List_of_Designated_Trauma_Facilities.5.9.17_571865_7.pdf</a>                                                                                                                                     | 4/16/20  | 1/7/20         |
| MN    | <a href="https://www.health.state.mn.us/facilities/traumasystem/designated_hospitals.html">https://www.health.state.mn.us/facilities/traumasystem/designated_hospitals.html</a>                                                                                                                                                                       | 4/16/20  | Unknown        |
| MO    | <a href="https://health.mo.gov/living/healthcondiseases/chronic/tcdsystem/designatedhospitals.php">https://health.mo.gov/living/healthcondiseases/chronic/tcdsystem/designatedhospitals.php</a>                                                                                                                                                       | 4/17/20  | Unknown        |
| MS    | <a href="https://msdh.ms.gov/msdhsite/_static/resources/2739.pdf">https://msdh.ms.gov/msdhsite/_static/resources/2739.pdf</a>                                                                                                                                                                                                                         | 4/17/20  | 11/1/19        |

|    |                                                                                                                                                                                                                                                                                                                                                   |         |               |
|----|---------------------------------------------------------------------------------------------------------------------------------------------------------------------------------------------------------------------------------------------------------------------------------------------------------------------------------------------------|---------|---------------|
| MT | <a href="https://dphhs.mt.gov/publichealth/emsts/traumasystems/designatedfacilities">https://dphhs.mt.gov/publichealth/emsts/traumasystems/designatedfacilities</a>                                                                                                                                                                               | 4/17/20 | Unknown       |
| NC | <a href="https://info.ncdhhs.gov/dhsr/EMS/trauma/traumacenter.html">https://info.ncdhhs.gov/dhsr/EMS/trauma/traumacenter.html</a>                                                                                                                                                                                                                 | 4/17/20 | 7/8/19        |
| ND | <a href="https://gishubdata.nd.gov/dataset/trauma-center-locations">https://gishubdata.nd.gov/dataset/trauma-center-locations</a>                                                                                                                                                                                                                 | 4/17/20 | 3/5/19        |
| NE | <a href="http://dhhs.ne.gov/OEHS%20Program%20Documents/Trauma%20Designated%20Hospitals.pdf">http://dhhs.ne.gov/OEHS%20Program%20Documents/Trauma%20Designated%20Hospitals.pdf</a>                                                                                                                                                                 | 4/17/20 | 7/22/19       |
| NH | <a href="https://www.nh.gov/safety/divisions/fstems/ems/forms.html#trauma">https://www.nh.gov/safety/divisions/fstems/ems/forms.html#trauma</a>                                                                                                                                                                                                   | 4/17/20 | January 2020  |
| NJ | <a href="https://www.nj.gov/labor/lpa/pub/empecon/healthcare.pdf">https://www.nj.gov/labor/lpa/pub/empecon/healthcare.pdf</a>                                                                                                                                                                                                                     | 4/17/20 | 2019          |
| NM | <a href="https://nmhealth.org/publication/view/general/1988/">https://nmhealth.org/publication/view/general/1988/</a>                                                                                                                                                                                                                             | 4/17/20 | 8/2/13        |
| NV | <a href="http://media.southernnevadahealthdistrict.org/download/ems/2019/2017-clark-county-trauma-system-report-Final.pdf">http://media.southernnevadahealthdistrict.org/download/ems/2019/2017-clark-county-trauma-system-report-Final.pdf</a>                                                                                                   | 4/17/20 | 2019          |
| NY | <a href="https://www.health.ny.gov/professionals/ems/state_trauma/trauma2.htm">https://www.health.ny.gov/professionals/ems/state_trauma/trauma2.htm</a>                                                                                                                                                                                           | 4/17/20 | February 2020 |
| OH | <a href="https://www.ems.ohio.gov/links/ems_tc_alphaorder.pdf">https://www.ems.ohio.gov/links/ems_tc_alphaorder.pdf</a>                                                                                                                                                                                                                           | 4/17/20 | 2/24/20       |
| OK | <a href="https://www.ok.gov/health2/documents/Region%201%20Trauma%20Plan.pdf">https://www.ok.gov/health2/documents/Region%201%20Trauma%20Plan.pdf</a>                                                                                                                                                                                             | 4/17/20 | Unknown       |
| OR | <a href="https://www.oregon.gov/oha/PH/PROVIDERPARTNERRESOURCES/EMSTRAUMASYSTEMS/TRAUMASYSTEMS/Pages/designlvl.aspx#level1">https://www.oregon.gov/oha/PH/PROVIDERPARTNERRESOURCES/EMSTRAUMASYSTEMS/TRAUMASYSTEMS/Pages/designlvl.aspx#level1</a>                                                                                                 | 4/17/20 | Unknown       |
| PA | <a href="http://ptsf.org/upload/PA_Trauma_Systems_Found_Annual_Report.pdf">http://ptsf.org/upload/PA_Trauma_Systems_Found_Annual_Report.pdf</a>                                                                                                                                                                                                   | 4/17/20 | 2019          |
| RI | <a href="https://health.ri.gov/publications/protocols/StatewideEmergencyMedicalServices.pdf">https://health.ri.gov/publications/protocols/StatewideEmergencyMedicalServices.pdf</a>                                                                                                                                                               | 4/17/20 | January 2020  |
| SC | <a href="https://www.scdhec.gov/health-professionals/sc-trauma-system">https://www.scdhec.gov/health-professionals/sc-trauma-system</a>                                                                                                                                                                                                           | 4/17/20 | Unknown       |
| SD | <a href="https://doh.sd.gov/providers/ruralhealth/trauma/designations.aspx">https://doh.sd.gov/providers/ruralhealth/trauma/designations.aspx</a>                                                                                                                                                                                                 | 4/17/20 | Unknown       |
| TN | <a href="https://www.tn.gov/health/health-program-areas/health-professional-boards/ems-board/ems-board/trauma-centers.html">https://www.tn.gov/health/health-program-areas/health-professional-boards/ems-board/ems-board/trauma-centers.html</a>                                                                                                 | 4/17/20 | Unknown       |
| TX | <a href="https://www.dshs.texas.gov/emstraumasystems/etrahosp.shtm">https://www.dshs.texas.gov/emstraumasystems/etrahosp.shtm</a>                                                                                                                                                                                                                 | 4/17/20 | 3/30/20       |
| UT | <a href="https://www.utahtrauma.org/registryMembers/documents/regionmap.pdf">https://www.utahtrauma.org/registryMembers/documents/regionmap.pdf</a>                                                                                                                                                                                               | 4/17/20 | January 2016  |
| VA | <a href="http://www.vdh.virginia.gov/emergency-medical-services/trauma-critical-care/virginia-trauma-centers/">http://www.vdh.virginia.gov/emergency-medical-services/trauma-critical-care/virginia-trauma-centers/</a>                                                                                                                           | 4/17/20 | February 2020 |
| VT | <a href="https://www.healthvermont.gov/sites/default/files/DEPRIP.%20New%202018%20FINAL%20VT%20EMS%20Statewide%20Protocols%202020%20April%202019_linked%20and%20locked.pdf">https://www.healthvermont.gov/sites/default/files/DEPRIP.%20New%202018%20FINAL%20VT%20EMS%20Statewide%20Protocols%202020%20April%202019_linked%20and%20locked.pdf</a> | 4/17/20 | 2018          |
| WA | <a href="https://www.doh.wa.gov/Portals/1/Documents/Pubs/530101.pdf">https://www.doh.wa.gov/Portals/1/Documents/Pubs/530101.pdf</a>                                                                                                                                                                                                               | 4/17/20 | January 2020  |
| WI | <a href="https://dhsgis.wi.gov/dhs/traumacare/">https://dhsgis.wi.gov/dhs/traumacare/</a>                                                                                                                                                                                                                                                         | 4/17/20 | Unknown       |
| WV | <a href="https://www.wvoems.org/media/375662/trauma%20center%20list_medical%20command_website%203_20_20.pdf">https://www.wvoems.org/media/375662/trauma%20center%20list_medical%20command_website%203_20_20.pdf</a>                                                                                                                               | 4/17/20 | 3/20/20       |
| WY | <a href="https://health.wyo.gov/wp-content/uploads/2020/01/Updated-Designation-List-1.2020.pdf">https://health.wyo.gov/wp-content/uploads/2020/01/Updated-Designation-List-1.2020.pdf</a>                                                                                                                                                         | 4/17/20 | January 2020  |
